# Supplementary material for: Das Praxispersonal im Kontext der hausärztlichen Demenzerkennung – ein ungehobenes Potenzial?
Source: Springer Nature journal article supplement (doi:10.1007/s00391-018-01484-1), 2018-11-26
Supplement: MOESM1 [file 16296710]

**Qualitative Leitfaden-Befragung: Praxispersonal**

- Einmal abgesehen vom Arzt/den Ärzten in Ihrer Praxis: Übernehmen Sie oder andere Mitarbeiter in Ihrer Praxis beim Thema Demenz bestimmte Aufgaben?
  - Welcher Art sind diese Aufgaben?
  - Welchen Beitrag leisten sie speziell bei der (frühzeitigen) Erkennung von Demenz?
  - Führen bestimmte Mitarbeiter regelmäßig Demenztests durch? Welche Tests kommen zum Einsatz?
  - Wie erfolgte die Aneignung des erforderlichen Wissens im Bereich Demenz bzw. zur Durchführung der Demenztests? Sind bestimmte Mitarbeiter auf dem Gebiet Demenz bewandert oder speziell geschult?
- Was schätzen Sie: Wie stark sind Sie oder Kollegen/innen im Praxisalltag eingebunden, wenn es darum geht, bei Patienten eine beginnende Demenz festzustellen bzw. auf entsprechende Warnsignale/Symptome zu achten?
  - Hat der Arzt Sie entsprechend dazu angewiesen, oder war es Ihr eigener Wunsch, sich hier einzubringen?
  - Gibt es eine vereinbarte Arbeitsteilung zwischen Ihnen und dem Arzt? Wie sieht diese aus?
- Wie sicher fühlen Sie sich, wenn es darum geht, im Praxisalltag auf eine beginnende Demenz bei Patienten aufmerksam zu werden (Erkennen von Warnsignalen)?
  - Was wird als Herausforderung erlebt?
  - Wie sicher fühlen Sie sich bei der Anwendung der entsprechenden Diagnostik? Was ist bei der Durchführung von Demenztests für Sie möglicherweise schwierig?
  - Wie leicht oder schwer ist es, eine Demenz im Frühstadium zu entdecken?
- Wie beurteilen Sie Ihre eigenen Möglichkeiten und Fähigkeiten, einen Beitrag zu einer effektiven Demenzdiagnostik in Ihrer Praxis zu leisten bzw. den Hausarzt gut dabei unterstützen zu können?
  - Wie beurteilen Sie die jetzige Situation? Fühlen Sie sich in die Erkennung bzw. Diagnostik von Demenzpatienten ausreichend eingebunden? Glauben Sie, dass Sie hier mehr leisten bzw. sich stärker einbringen könnten? Hätten Sie ein Interesse daran?
- Gab es schon Situationen, in denen Sie den Eindruck hatten, den Arzt effektiv bei der Erkennung einer beginnenden Demenz bei Patienten unterstützen zu können – ich meine Situationen, in denen dem Arzt durch Ihre Mithilfe eine beginnende Demenz erst aufgefallen ist? Wie häufig kam das vor?
  - Falls nein: Glauben Sie, es wäre sinnvoll, wenn Sie in Ihrer Praxis bei der Erkennung von Frühdemenz bei Patienten eingebunden wären und den Arzt unterstützen würden? Wäre dadurch eine schnellere Demenz-Erkennung möglich?
- Wie würden Sie Ihre eigene Kompetenz/Kenntnisse beurteilen, wenn es um die (Früh)Erkennung von Demenz geht? Wie gut kennen Sie sich mit dem Thema aus? Wo fühlen Sie sich sicher, wo weniger sicher? Was würden Sie gerne noch lernen?
- Haben Sie bereits eine oder mehrere Fortbildungen besucht, in denen Demenz ein relevantes Thema war? Welche Fortbildungen waren das? Wie viel haben sie gebracht (was hat gefallen, was weniger gefallen)?
- Glauben Sie, dass Ihr Vorgesetzter/Ihre Vorgesetzte es für eine gute Sache hielte, wenn Sie stärker in die Demenzerkennung in der Praxis eingebunden wären? Als wie groß beurteilen Sie seine/ihre Bereitschaft, wenn es darum geht, das Praxispersonal hinsichtlich der Demenzdiagnostik zu schulen und entsprechend zu integrieren (Bereitschaft, eine Fortbildung zu genehmigen)?
- Gelegentlich hört und liest man, dass in vielen Hausarztpraxen die Demenz von (langjährigen) Patienten lange Zeit unerkannt bleibt und häufig erst im fortgeschrittenen Stadium diagnostiziert wird. Was würde Ihrer Meinung nach helfen, dass Hausärzte die Diagnose Demenz rechtzeitiger stellen können bzw. die Demenzerkennung effektiver wird? Was müsste verändert oder verbessert werden?
- Man hört gelegentlich den Vorschlag, dass speziell geschulte Praxismitarbeiter, die sich mit dem Thema Demenz auskennen, die Ärzte effektiv bei der Betreuung und Früherkennung von Demenzpatienten unterstützen könnten. Wie denken Sie darüber? Inwiefern glauben Sie, dass Demenz bei Patienten dann früher erkannt und Patienten besser betreut werden könnten?
